# Supplementary material for: The impact of sea spray aerosol on photochemical ozone formation over eastern China: heterogeneous reaction of chlorine particles and radiative effect
Source: Copernicus journal article supplement (doi:10.5194/egusphere-2024-4132), 2025-02-11
Supplement: Supplementary file [file egusphere-2024-4132-AC2-supplement.pdf]

## Response to the comment from Anonymous referee #1

"The impact of sea spray aerosol on photochemical ozone formation over eastern China: heterogeneous reaction of chlorine particles and radiative effect" by Hong et al. is a well-written and well-motivated manuscript. It is of high interest and importance to detangle the influence of sea salt particles and their chloride-depleting reactions on ozone formation and the concentration of various species involved with the production of ozone. The manuscript is written clearly and concisely. I have a few questions/comments about the chemical reactions considered in the paper and the adjustment of photolysis rates due to increased scattering by aerosol particles. Those comments can be found below.

### Specific scientific questions/comments:

[Comment 1] Lines 124 – 126: Have the abilities of the CMAQ model to adjust photolysis rates based on the presence of aerosols been verified or evaluated in previous works? Adjustments to photolysis rates are a big discussion point for the paper and its results, so it would be great to understand how accurate the estimated adjustments are in the first place.

Response: Thanks for your valuable suggestion. The calculation of photolysis rates in CMAQ uses an in-line approach for calculating actinic fluxes by solving a two-stream approximation of the radiative transfer equation (Binkowski et al., 2007; Toon et al., 1989) over wavebands based on the FAST-J photolysis model (Wild et al., 2000). Each layer includes scattering and extinction using simulated air density, cloud condensates, aerosols and trace gaseous such as O<sub>3</sub> and NO<sub>2</sub> (Appel et al., 2017). This approach has been verified or evaluated in some previous studies. Based on the aircraft measurement, Baker et al. (2018) found that the CMAQ model can well capture the observed NO<sub>2</sub> photolysis rates at ~2km height. Using this approach, Fu et al. (2014) concluded that the NO<sub>2</sub> and O<sub>3</sub> photolysis rates reduced by up to 2.4% and 1.9% respectively, due to the impact of dust aerosol during a heavy dust event. Fan and Li (2022) also found that the O<sub>3</sub> photolysis rates decreased by 1-4% due to the extinction effect of SSA. These references provide robustness of the CMAQ model to calculate the photolysis rates. It enables us to assess the effect of aerosols (e.g., SSA) on photochemical processes by adjusting photolysis rates accordingly. We have provided more discussions in the manuscript.

### Revision in the updated manuscript:

(1) Line 129: "The calculation of photolysis rates in CMAQ uses an in-line approach for calculating actinic fluxes by solving a two-stream approximation of the radiative transfer equation (Binkowski et al., 2007; Toon et al., 1989) over wavebands based on the FAST-J photolysis model (Wild et al., 2000). Each layer includes scattering and extinction using simulated air density, cloud condensates, aerosols and trace gaseous such as O<sub>3</sub> and NO<sub>2</sub> (Appel et al., 2017). This approach has been verified or evaluated in some previous studies. Based on the aircraft measurement, Baker et al. (2018) found that the CMAQ model can well capture the observed NO<sub>2</sub> photolysis rates at ~2km height. Using this approach, Fu et al. (2014) concluded that the NO<sub>2</sub> and O<sub>3</sub> photolysis rates reduced by up to 2.4% and 1.9% respectively, due to the impact of dust aerosol during a heavy dust event. Fan and Li (2022) also found that the O<sub>3</sub> photolysis rates decreased by 1-4% due to the extinction effect of SSA. These references provide robustness of the CMAQ model to calculate the photolysis rates. It enables us to assess the effect of aerosols (e.g., SSA) on photochemical processes by adjusting photolysis rates

accordingly.”

[Comment 2] Lines 128-1137: I see that the model’s capability was not expanded to include reactions with SO<sub>2</sub> (g) and sea salt particles, which can be another source of chlorine radicals via chloride depletion. Would you mind adding some discussion here as to why SO<sub>2</sub> was not considered. I also wonder how it would affect the results and your comparisons to other studies if SO<sub>2</sub> were considered... some discussion on this would be nice.

Response: Thanks for raising this important issue. Gaseous SO<sub>2</sub> cannot react with SSA directly. However, it can be oxidated into H<sub>2</sub>SO<sub>4</sub> and then react with SSA, releasing gaseous HCl. The oxidation of SO<sub>2</sub> is considered in the SAPRC07TIC gas-phase chemistry module and the reaction between H<sub>2</sub>SO<sub>4</sub> and Cl<sup>-</sup> is handled in AERO6i aerosol module (ISORROPIA model) in original CMAQ. However, as shown in the following figure (Fig. R1), the changes of SO<sub>2</sub> mixing ratio induced by SSA is generally smaller than 0.1 ppbV, which suggested that the negligible role of SO<sub>2</sub> in the SSA impact. We have added some discussions in the revised manuscript.

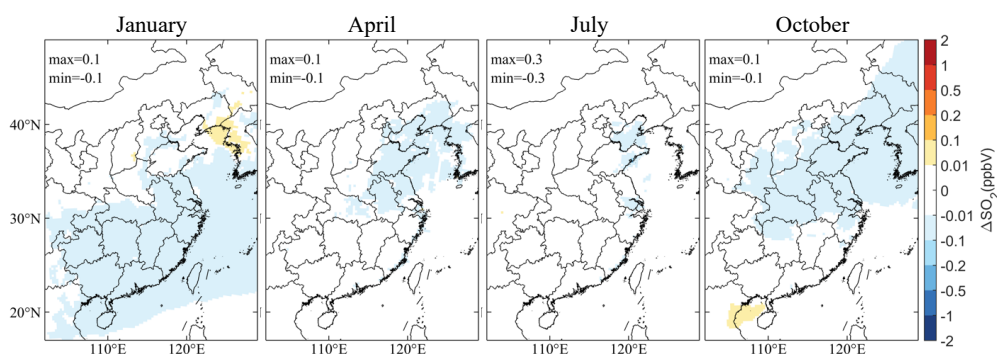

Figure R1: Changes in simulated monthly mean SO<sub>2</sub> mixing ratios near surface caused by SSA during January, April, July and October 2015.

Revision in the updated manuscript:

(1) Line 141: “The AERO6i aerosol module employed ISORROPIA (Binkowski and Roselle, 2003; Fountoukis and Nenes, 2007; Kelly et al., 2010) to uniformly simulates inorganic aerosol thermodynamics. The chlorine deposition of SSA through its equilibrium reactions with H<sub>2</sub>SO<sub>4</sub> and HNO<sub>3</sub> were considered in the model (Liu et al., 2015)”

(2) Line 283: “It should be noted that besides heterogenous reactions with nitrogen-containing species, particulate Cl<sup>-</sup> in SSA can react with H<sub>2</sub>SO<sub>4</sub> and HNO<sub>3</sub> through thermodynamic equilibrium reactions, releasing gaseous HCl (Chi et al., 2015). HCl is another precursor of Cl radicals via its reaction with OH radicals, which generally occurred during daytime (Finlayson-Pitts, 2003). However, as shown in Fig. S6, the contribution of HCl to Cl radicals is much lower than the photolysis of ClNO and ClNO<sub>2</sub>. Such small contribution of HCl were also reported in a box-model study in North China Plain (Liu et al., 2017). It suggests that the limited role of these thermodynamic equilibrium reactions in the Cl radicals and following O<sub>3</sub> formation.”

[Comment 3] Lines 205-210: Just to confirm, when you are discussing particulate  $\text{Cl}^-$  here, is that the chlorine remaining after chloride depleting reactions have already been processed in the model? Or are you just discussing the simple change in particulate chloride concentrations before and after including them in the model (BASE vs. NOSA)? I ask because at first, I thought you were just showing the change in particulate  $\text{Cl}^-$  moving from NOSA to BASE, but before accounting for chloride depleting reactions. However, you mention that particulate chloride concentrations are higher aloft due to depletion reactions near the surface. This implies you have already run the model in full and accounted for depletion reactions when discussing these results. A bit of clarification would be very helpful here to know if 'particulate chloride' is referring to conditions before or after the depletion reactions have been accounted for by the model. The caption in figures S3 and S4 is not explicit in saying if these are particulate  $\text{Cl}^-$  mass concentrations \*before or after\* accounting for chloride depleting reactions. I was a bit confused as it seemed the discussion of chloride depletion really began in the subsequent section (Sect. 3.2) and that Sect 3.1 was more centered on discussing the results of considering sea salt particles in the model.

Response: Sorry for making this confusion. We just discuss the simple change in particulate  $\text{Cl}^-$  concentrations before and after including them in the model (BASE minus NOSA). We have clarified the description in the revised manuscript. The figure captions in the manuscript and SI are also clarified.

Revision in the updated manuscript:

(1) Line 221: “Additionally, the simulated changes in particulate  $\text{Cl}^-$  concentrations due to SSA (BASE minus NOSA) are shown in Fig S3 and S4.”

(2) Line 225: “In polluted lower atmosphere, particulate  $\text{Cl}^-$  in SSA can be chemically depleted through thermodynamic equilibrium processes and heterogeneous reactions, which will be discussed in the following section.”

[Comment 4] Line 207-208: You mention that depletion reactions with  $\text{HNO}_3$  and  $\text{H}_2\text{SO}_4$  may explain lower particulate  $\text{Cl}^-$  concentrations near the surface. I didn't think you were accounting for reactions with  $\text{H}_2\text{SO}_4$  in the model, so how would reactions with  $\text{H}_2\text{SO}_4$  be a partial explanation for the lower simulated  $\text{Cl}^-$  mass concentrations near the surface?

Response: Thanks for your comment. The original CMAQ model has considered the reactions of particulate  $\text{Cl}^-$  with  $\text{HNO}_3$  and  $\text{H}_2\text{SO}_4$ . These thermodynamic equilibrium reactions are handled in the ISORROPIA model. Please also see our responses to the above 2<sup>nd</sup> comment. The chlorine depletion of SSA with  $\text{H}_2\text{SO}_4$  and  $\text{HNO}_3$  can be partial contributors to the depletion of SSA near the surface, but its impact on  $\text{Cl}$  radicals is limited (see Fig. S6). We have added some discussions in the manuscript.

Revision in the manuscript:

(1) Line 129: “The AERO6i aerosol module employed ISORROPIA (Binkowski and Roselle, 2003; Fountoukis and Nenes, 2007; Kelly et al., 2010) to uniformly simulates inorganic aerosol thermodynamics. The chlorine deposition of SSA through its equilibrium reactions with  $\text{H}_2\text{SO}_4$  and  $\text{HNO}_3$  were considered in the model (Liu et al., 2015)”

(2) Line 283: “It should be noted that besides heterogenous reactions with nitrogen-containing species, particulate  $\text{Cl}^-$  in SSA can react with  $\text{H}_2\text{SO}_4$  and  $\text{HNO}_3$  through thermodynamic equilibrium reactions, releasing gaseous  $\text{HCl}$  (Chi et al., 2015).  $\text{HCl}$  is another precursor of  $\text{Cl}$  radicals via its

reaction with OH radicals, which generally occurred during daytime (Finlayson-Pitts, 2003). However, as shown in Fig. S6, the contribution of HCl to Cl radicals is much lower than the photolysis of ClNO and ClNO<sub>2</sub>. Such small contribution of HCl were also reported in a box-model study in North China Plain (Liu et al., 2017). It suggests that the limited role of these thermodynamic equilibrium reactions in the Cl radicals and following O<sub>3</sub> formation.”

[Comment 5] Lines 223 – 228: Again, since you are providing specific numbers for changes in NO<sub>x</sub>, I think it would be great to reiterate that you are not accounting for reactions between SO<sub>2</sub> and sea salt particles in your model simulations. If you have an idea of how significantly/insignificantly accounting for reactions with SO<sub>2</sub> and sea salt particles would affect your results, that may be good to mention here.

Response: Thanks for your valuable suggestion. According to our response to the 2<sup>st</sup> comment, the reactions between SO<sub>2</sub> and SSA in our model simulation is insignificant, which may not affect our results. We have provided some discussion in the revised manuscript.

Revision in the updated manuscript:

(1) Line 283: “It should be noted that besides heterogenous reactions with nitrogen-containing species, particulate Cl<sup>-</sup> in SSA can react with H<sub>2</sub>SO<sub>4</sub> and HNO<sub>3</sub> through thermodynamic equilibrium reactions, releasing gaseous HCl (Chi et al., 2015). HCl is another precursor of Cl radicals via its reaction with OH radicals, which generally occurred during daytime (Finlayson-Pitts, 2003). However, as shown in Fig. S6, the contribution of HCl to Cl radicals is much lower than the photolysis of ClNO and ClNO<sub>2</sub>. Such small contribution of HCl were also reported in a box-model study in North China Plain (Liu et al., 2017). It suggests that the limited role of these thermodynamic equilibrium reactions in the Cl radicals and following O<sub>3</sub> formation.”

[Comment 6] Line 262: You mention increases in Cl radicals after sunrise are more pronounced at higher altitudes. Should there be something to direct readers to Fig. 5? I did not see Fig. 5 mentioned in the text, but it is possible I missed it. Can you be more clear by what you mean that ‘increases in Cl radicals are more pronounced at higher altitudes shortly after sunrise’? In Fig. 5, I see the changes in Cl concentrations after sunrise are pretty similar in the boundary layer compared to right above the boundary layer for the three cities. Changes in Cl radical concentrations above 2 km are often 0.

Response: Thanks for your carefully review. This is a typo and we mistakenly removed some words of this paragraph in the original manuscript. In the revised manuscript, we have mentioned Fig. 5 in the text to explain the diurnal and vertical changes in Cl radicals induced by SSA. Besides, we have provided a clearer description and discussion in the vertical changes of Cl radicals.

Revision in the updated manuscript:

(1) Line 277: “Furthermore, the impact of SSA on Cl radicals is observed not only at the surface but also vertically through the atmosphere. Figure 5 examines the vertical-diurnal variations in SSA-induced Cl radical concentrations in Beijing, Shanghai, and Guangzhou.”

(2) Line 280: “These increases are more pronounced near the top of planetary boundary layer shortly after sunrise, suggesting the impact of SSA on Cl radicals is more significant in upper levels than near the surface.”

[Comment 7] Lines 275 – 286: It's interesting that  $J(\text{NO}_2)$  was decreased considerably in the upper troposphere. That high, you would presumably have higher actinic flux and less scattering from sea salt than at the surface. Fig 1 shows that changes in sea salt particle mass (using  $\text{Na}^+$  as a proxy) in the upper troposphere are close to zero. Are these low mass concentrations enough to scatter enough radiation to reduce  $J(\text{NO}_2)$  to the same degree as it is reduced at the surface, especially considering the higher actinic flux aloft? Perhaps some discussion here to elaborate on the result would be useful and of interest.

Response: Thanks for your valuable comment. The effect of aerosol particles on the extinction depends on their size distribution. Generally, fine particles have higher extinction effect than coarse particles (Molnár and Mészáros, 2001), and it can be transported to the higher levels. As a result, despite low concentrations in upper levels (2-3 km), fine SSA can reduce  $J(\text{NO}_2)$  to the same degree as those near the surface. We have provided some discussions in the revised manuscript.

Revision in the manuscript:

(1) Line 303: “We note that the extinction effect of SSA can extend into the upper levels (2-3 km), where the decrease in  $J(\text{NO}_2)$  can be the same degree as those observed near the surface. This is because the aerosol extinction effect depends on particle size distribution. Fine SSA particles have higher extinction effect than coarse ones (Molnár and Mészáros, 2001), and it can be transported to the higher levels.”

[Comment 8] Lines 291 – 294: Correct me if I'm wrong but Fig. 7 shows differences between the NOSA and BASE simulations. Thus, wouldn't the VOC concentrations be the same over the remote oceanic regions in both scenarios? If not, please explain why. If not, then perhaps the main explanation for lower  $\text{HO}_2$  concentrations over remote oceanic regions is reduced photolysis due to scattering by sea salt particles? It's impressive the reduction in photolysis due to light scattering is enough to decrease production of  $\text{HO}_2$  when Cl-radicals from chloride depletion reactions are considered in the model. Fig. 4 shows that there were considerable increases in Cl- radicals over these remote oceanic regions, yet the competing effect of scattering by sea salt particles seems to have countered any increases in  $\text{HO}_2$  that would be caused by additionally available Cl- radicals. As mentioned earlier, it would be great to understand and/or mention the robustness and accuracy of the changes in photolysis rates due to increased SSA scattering in the model since this is such a prominent topic/result of the paper.

Response: Thank you for your valuable suggestion. The VOC concentrations are the same over the remote oceanic regions in both scenarios. We agree that the decreased  $\text{HO}_2$  over remote oceanic regions is mainly attributed to the reduced photolysis rates caused by SSA. Please see our responses to the 1<sup>st</sup> comment for the discussions of the CMAQ module to calculate the photolysis rates.

Revision in the manuscript:

(1) Line 319: “In remote oceanic regions, where VOC concentration is generally low, a decrease in  $\text{HO}_2$  can be observed. This decrease is mainly attributed to the reduced photolysis rates due to the extinction effect of SSA, which seems to have countered any increases in  $\text{HO}_2$  that would be caused by additionally available Cl radicals (Fig. 4c).”

[Comment 9] Lines 309-312: Similar comment as above. The decreases in OH concentrations in the troposphere are interesting considering that sea salt particle mass concentrations are presumably low at those altitudes and actinic fluxes are stronger. I know the transport of SSA is possible above the boundary layer as you mentioned, but changes in SSA above 3 km are mostly zero across all months. It is interesting that the scattering from such relatively low amounts of SSA is enough to offset any potential increases in OH due to increased presence of Cl<sup>-</sup> radicals (although the change in Cl<sup>-</sup> radicals above 3 km is also close to 0 for all months). There is not really an action item for this comment, I just found it interesting and I think the results would be strengthened by mentioning/citing the validity of the simulated changes in photolysis rates due to increased SSA scattering at least once somewhere in the paper.

Response: Thanks for your valuable suggestion. There are some previous studies verified and evaluated the module to calculate the photolysis rates in CMAQ. We have cited these references in the manuscript. Please also see our responses to the above 1<sup>st</sup> and 7<sup>th</sup> comment.

[Comment 10] Lines 335 – 356: The relationship between the sign of the change in O<sub>3</sub> and whether or not the region is NO<sub>x</sub>- or VOC-limited is interesting. Previously, reductions in concentrations of various radicals and species involved with the NO<sub>x</sub>-VOC-O<sub>3</sub> system of reactions were attributed primarily to changes in photolysis rates due to scattering by sea salt particles. I wonder now if whether those altitudes are NO<sub>x</sub>- or VOC-limited may be of interest to consider for explaining reductions in the concentrations of those species at higher altitudes? The regime is mentioned when considering the vertical profile in changes of O<sub>3</sub> concentrations, so I wonder if a similar discussion of regime would be appropriate to at least mention for other species involved in reactions related to the production of O<sub>3</sub>?

Response: Thank you for your valuable suggestion to further explore the role of NO<sub>x</sub>/VOC-limited regimes in explaining altitude-dependent changes in ozone-related species. Higher levels are generally in NO<sub>x</sub>-limited conditions due to lower NO<sub>x</sub> concentrations (Wang et al., 2025; Lin et al., 2022), and the SSA-induced decrease in NO<sub>x</sub> can reduce O<sub>3</sub> formation. We have added some discussions in the revised manuscript.

Revision in the manuscript:

(1) Line 386: “We also find significant decreases in SSA-induced O<sub>3</sub> concentrations over oceanic regions (Fig. 10) and in the upper levels (Fig. 11). This decline can be explained by two reasons: For one thing, remote oceanic areas (Fig. 10c) and upper levels (Wang et al., 2025; Lin et al., 2022) are generally in NO<sub>x</sub>-limited conditions due to lower NO<sub>x</sub> concentrations, and the SSA-induced decrease in NO<sub>x</sub> (Fig. 3) reduce O<sub>3</sub> formation; for another, in these areas with scant VOCs, SSA-induced Cl radicals preferentially react with O<sub>3</sub> to form ClO (as depicted in Fig. S9 and S10), which enhances O<sub>3</sub> depletions. This behavior mirrors stratospheric conditions where Cl radicals are pivotal in consuming O<sub>3</sub>.”

[Comment 11] Line 260: Typo? Says “Furthe es”

Response: Thanks for pointing out this typo. We mistakenly removed some words of this paragraph in the original manuscript. We have corrected this issue.

Revision in the updated manuscript:

(1) Line 277: “Furthermore, the impact of SSA on Cl radicals is observed not only at the surface but also vertically through the atmosphere. Figure 5 examines the vertical-diurnal variations in SSA-induced Cl radical concentrations in Beijing, Shanghai, and Guangzhou.”
